# Supplementary material for: Small molecule activators of SIRT1 replicate signaling pathways triggered by calorie restriction in vivo
Source: PubMed Central journal article supplement (PMC2660283; doi:10.1186/1752-0509-3-31), 2009-03-10
Supplement: 1752-0509-3-31-S2.pdf [file 1752-0509-3-31-S2.pdf]

## Supplemental data figure legends

### Supplemental Data Figure 1 -State changes supporting statistically significant hypotheses described in the manuscript.

Green – measured and observed increase in RNA expression. Red – measured and observed decrease in RNA expression. Yellow – hypothesized increase in abundance or activity. Blue – hypothesized decrease in abundance or activity.

- [a] Increased CR hypothesis
- [b] Resveratrol hypothesis
- [c] Increased transcriptional activity of Esrr $\alpha$  hypothesis
- [d] Decreased transcriptional activity of Nrip1 hypothesis
- [e] Increased transcriptional activity of Ppar $\alpha$  hypothesis
- [f] Increased transcriptional activity of Ppar $\gamma$  hypothesis
- [g] Increased transcriptional activity of Ppar $\delta$  hypothesis
- [h] Increased transcriptional activity of Ppargc1 $\alpha$  hypothesis
- [i] Decreased abundance of Egf
- [j] Decreased transcriptional activity of the NF- $\kappa$ B complex
- [k] Increased transcriptional activity of Nr3c1
- [l] Decreased abundance of Tnf $\alpha$

### Supplemental Data Figure 2 -Effects of three days of SRT1720 treatment on transcript data from mouse livers, compared to SRT501 treatment.

Scatter plot obtained by graphing fold changes of significant probe sets supporting hypotheses in the SRT1720 dataset comparison versus the SRT501 dataset comparison.

- [a] Increased CR hypothesis
- [b] Resveratrol hypothesis
- [c] Increased transcriptional activity of Esrr $\alpha$  hypothesis
- [d] Decreased transcriptional activity of Nrip1 hypothesis
- [e] Increased transcriptional activity of Ppar $\alpha$  hypothesis
- [f] Increased transcriptional activity of Ppar $\gamma$  hypothesis
- [g] Increased transcriptional activity of Ppar $\delta$  hypothesis
- [h] Increased transcriptional activity of Ppargc1 $\alpha$  hypothesis
- [i] Decreased abundance of Egf
- [j] Decreased transcriptional activity of the NF- $\kappa$ B complex

[k] Increased transcriptional activity of Nr3c1

[l] Decreased abundance of Tnf $\alpha$

# Supplemental Data Figure 1

[a]

| Calorie Restriction (CR)            |                           |
|-------------------------------------|---------------------------|
|                                     | SRT501 Dataset Comparison |
| Calorie Restriction (CR) hypothesis | ↑                         |
| exp(1110067D22Rik)                  | ↓                         |
| exp(4933429D07Rik)                  | ↑                         |
| exp(Acaa1b)                         | ↑                         |
| exp(Acadm)                          | ↑                         |
| exp(Acot1)                          | ↑                         |
| exp(Acot2)                          | ↑                         |
| exp(Acs1)                           | ↑                         |
| exp(Acsm3)                          | ↑                         |
| exp(Akp2)                           | ↑                         |
| exp(Aldh9a1)                        | ↑                         |
| exp(Angpt14)                        | ↑                         |
| exp(Anxa7)                          | ↑                         |
| exp(Aox1)                           | ↑                         |
| exp(AU018778)                       | ↑                         |
| exp(Bnip3)                          | ↑                         |
| exp(C230093N12Rik)                  | ↑                         |
| exp(Cd36)                           | ↑                         |
| exp(Ceacam1)                        | ↓                         |
| exp(Ces3)                           | ↑                         |
| exp(Cm1)                            | ↓                         |
| exp(Coq10b)                         | ↑                         |
| exp(Cpt1a)                          | ↑                         |
| exp(Cpt2)                           | ↑                         |
| exp(Crat)                           | ↑                         |
| exp(Creg1)                          | ↑                         |
| exp(Ctse)                           | ↓                         |
| exp(Cyp4a10)                        | ↑                         |
| exp(Cyp4a14)                        | ↑                         |
| exp(Dci)                            | ↑                         |
| exp(Dnajb6)                         | ↑                         |
| exp(Ehhadh)                         | ↑                         |
| exp(Fcgrt)                          | ↑                         |
| exp(Foxo3a)                         | ↑                         |
| exp(Gstt2)                          | ↑                         |
| exp(Hsd17b11)                       | ↑                         |
| exp(Hsd12)                          | ↑                         |
| exp(Id2)                            | ↓                         |
| exp(Ly6e)                           | ↓                         |
| exp(Mbd1)                           | ↑                         |
| exp(Nab2)                           | ↓                         |
| exp(Oprs1)                          | ↓                         |
| exp(Peci)                           | ↑                         |
| exp(Pex11a)                         | ↑                         |
| exp(Pfkfb3)                         | ↑                         |
| exp(Sgp1)                           | ↓                         |
| exp(Slc22a5)                        | ↑                         |
| exp(Slc25a20)                       | ↑                         |
| exp(Sorbs1)                         | ↑                         |
| exp(St3gal5)                        | ↑                         |
| exp(Txnip)                          | ↑                         |
| exp(Ubb)                            | ↑                         |
| exp(Usp2)                           | ↑                         |
| exp>Wee1)                           | ↑                         |
| exp(Zfp306)                         | ↑                         |

[b]

| Resveratrol Treatment            |                           |
|----------------------------------|---------------------------|
|                                  | SRT501 Dataset Comparison |
| Resveratrol Treatment hypothesis | ↑                         |
| exp(2410014A08Rik)               | ↑                         |
| exp(Acaa1a)                      | ↑                         |
| exp(Acad11)                      | ↑                         |
| exp(Acadm)                       | ↑                         |
| exp(Acat1)                       | ↑                         |
| exp(Acox1)                       | ↑                         |
| exp(Acpp)                        | ↓                         |
| exp(Acs1)                        | ↑                         |
| exp(Acsm3)                       | ↑                         |
| exp(Adfp)                        | ↑                         |
| exp(Aldh1a7)                     | ↑                         |
| exp(Angpt14)                     | ↑                         |
| exp(Aptx)                        | ↑                         |
| exp(Ar)                          | ↑                         |
| exp(Ass1)                        | ↓                         |
| exp(Bbc3)                        | ↓                         |
| exp(Bnip3)                       | ↑                         |
| exp(Canx)                        | ↑                         |
| exp(Cd36)                        | ↑                         |
| exp(Cetn2)                       | ↑                         |
| exp(Cks2)                        | ↓                         |
| exp(Copz2)                       | ↓                         |
| exp(Cpt1a)                       | ↑                         |
| exp(Ctsl)                        | ↓                         |
| exp(Cyp1a1)                      | ↑                         |
| exp(Cyp1a2)                      | ↑                         |
| exp(Enc1)                        | ↑                         |
| exp(Fcgrt)                       | ↑                         |
| exp(Foxo3a)                      | ↑                         |
| exp(Gldc)                        | ↓                         |
| exp(Hadha)                       | ↑                         |
| exp(Hao1)                        | ↑                         |
| exp(Hmgcs2)                      | ↑                         |
| exp(Hspb1)                       | ↑                         |
| exp(Id2)                         | ↓                         |
| exp(Irf1)                        | ↓                         |
| exp(Ly6e)                        | ↓                         |
| exp(Maoa)                        | ↑                         |
| exp(Mat2a)                       | ↑                         |
| exp(Mbd1)                        | ↑                         |
| exp(Ndrgr1)                      | ↑                         |
| exp(Nrn1)                        | ↓                         |
| exp(Nuak2)                       | ↓                         |
| exp(Odc1)                        | ↑                         |
| exp(P4hb)                        | ↑                         |
| exp(Pdia6)                       | ↑                         |
| exp(Pdlim1)                      | ↓                         |
| exp(Psen2)                       | ↓                         |
| exp(Rpn2)                        | ↑                         |
| exp(Sdc1)                        | ↓                         |
| exp(Sirpa)                       | ↓                         |
| exp(Slc25a20)                    | ↑                         |
| exp(Slc29a1)                     | ↓                         |
| exp(Slc35b1)                     | ↑                         |
| exp(Slc3a2)                      | ↑                         |
| exp(Slc6a6)                      | ↓                         |
| exp(Sod2)                        | ↑                         |
| exp(Sorbs1)                      | ↑                         |
| exp(Tnk2)                        | ↓                         |
| exp(Txnip)                       | ↑                         |
| exp(Vnn1)                        | ↑                         |
| exp(Zfp131)                      | ↑                         |

[c]

| taof(Esrra)            |                           |
|------------------------|---------------------------|
|                        | SRT501 Dataset Comparison |
| taof(Esrra) hypothesis | ↑                         |
| exp(Acadm)             | ↑                         |
| exp(Acox1)             | ↑                         |
| exp(Acs1)              | ↑                         |
| exp(Alas1)             | ↑                         |
| exp(Aldh1a7)           | ↑                         |
| exp(Cd36)              | ↑                         |
| exp(Etfhdh)            | ↑                         |
| exp(Fabp1)             | ↑                         |
| exp(Fabp2)             | ↑                         |
| exp(Hadha)             | ↑                         |
| exp(Hsd17b4)           | ↑                         |

[d]

| taof(Nrip1)            |                           |
|------------------------|---------------------------|
|                        | SRT501 Dataset Comparison |
| taof(Nrip1) hypothesis | ↓                         |
| exp(Acaa2)             | ↑                         |
| exp(Acadl)             | ↑                         |
| exp(Acadm)             | ↑                         |
| exp(Cpt2)              | ↑                         |
| exp(Crat)              | ↑                         |
| exp(Dci)               | ↑                         |
| exp(Decr1)             | ↑                         |
| exp(Ehhadh)            | ↑                         |
| exp(Etfhdh)            | ↑                         |
| exp(Hadha)             | ↑                         |
| exp(Hadhb)             | ↑                         |
| exp(Slc25a20)          | ↑                         |
| exp(Suclg1)            | ↑                         |

[e]

| taof(Ppara)            |                           |
|------------------------|---------------------------|
|                        | SRT501 Dataset Comparison |
| taof(Ppara) hypothesis | ↑                         |
| exp(Acaa1a)            | ↑                         |
| exp(Acaa1b)            | ↑                         |
| exp(Acaa2)             | ↑                         |
| exp(Acadl)             | ↑                         |
| exp(Acadm)             | ↑                         |
| exp(Acat1)             | ↑                         |
| exp(Acot1)             | ↑                         |
| exp(Acot2)             | ↑                         |
| exp(Acot8)             | ↑                         |
| exp(Acox1)             | ↑                         |
| exp(Acsi1)             | ↑                         |
| exp(Akr1d1)            | ↓                         |
| exp(Apoa5)             | ↑                         |
| exp(Asl)               | ↓                         |
| exp(Ass1)              | ↓                         |
| exp(Cd36)              | ↑                         |
| exp(Cps1)              | ↓                         |
| exp(Cpt1a)             | ↑                         |
| exp(Cpt2)              | ↑                         |
| exp(Crat)              | ↑                         |
| exp(Cth)               | ↓                         |
| exp(Cyp1a1)            | ↑                         |
| exp(Cyp4a10)           | ↑                         |
| exp(Cyp4a14)           | ↑                         |
| exp(Dci)               | ↑                         |
| exp(Decr1)             | ↑                         |
| exp(Decr2)             | ↑                         |
| exp(Dhrs4)             | ↑                         |
| exp(Ech1)              | ↑                         |
| exp(Ehhadh)            | ↑                         |
| exp(Ftcd)              | ↓                         |
| exp(Gls2)              | ↓                         |
| exp(Gnmt)              | ↓                         |
| exp(Gst2)              | ↑                         |
| exp(Hadha)             | ↑                         |
| exp(Hadhb)             | ↑                         |
| exp(Hal)               | ↓                         |
| exp(Hmgcs2)            | ↑                         |
| exp(Hsd17b4)           | ↑                         |
| exp(ld2)               | ↓                         |
| exp(Mgll)              | ↑                         |
| exp(Odc1)              | ↑                         |
| exp(Pctp)              | ↑                         |
| exp(Peci)              | ↑                         |
| exp(Pex11a)            | ↑                         |
| exp(Pla2g6)            | ↑                         |
| exp(Slc22a5)           | ↑                         |
| exp(Slc25a20)          | ↑                         |
| exp(Sorbs1)            | ↑                         |
| exp(Vnn1)              | ↑                         |

[f]

| taof(Pparγ)            |                           |
|------------------------|---------------------------|
|                        | SRT501 Dataset Comparison |
| taof(Pparγ) hypothesis | ↑                         |
| exp(Acaa1a)            | ↑                         |
| exp(Acaa1b)            | ↑                         |
| exp(Acadl)             | ↑                         |
| exp(Acadm)             | ↑                         |
| exp(Acat1)             | ↑                         |
| exp(Acox1)             | ↑                         |
| exp(Acsi1)             | ↑                         |
| exp(Adfp)              | ↑                         |
| exp(Angptl4)           | ↑                         |
| exp(Cd36)              | ↑                         |
| exp(Cfd)               | ↑                         |
| exp(Cited2)            | ↓                         |
| exp(Crat)              | ↑                         |
| exp(Ctps)              | ↑                         |
| exp(Cyp4a10)           | ↑                         |
| exp(Cyp4a14)           | ↑                         |
| exp(Ehhadh)            | ↑                         |
| exp(Etfdh)             | ↑                         |
| exp(Fabp1)             | ↑                         |
| exp(Hadha)             | ↑                         |
| exp(Hadhb)             | ↑                         |
| exp(Hmgcs2)            | ↑                         |
| exp(Hsd17b12)          | ↑                         |
| exp(ld2)               | ↓                         |
| exp(Maoa)              | ↑                         |
| exp(Mgll)              | ↑                         |
| exp(Ndg2)              | ↑                         |
| exp(Orm3)              | ↓                         |
| exp(Paqr7)             | ↑                         |
| exp(Pctp)              | ↑                         |
| exp(Pex11a)            | ↑                         |
| exp(Retsat)            | ↑                         |
| exp(S3-12)             | ↑                         |
| exp(Slc25a20)          | ↑                         |
| exp(Slc29a1)           | ↓                         |
| exp(Sorbs1)            | ↑                         |
| exp(Tpm2)              | ↑                         |
| exp(Txnip)             | ↑                         |
| exp(Vnn1)              | ↑                         |

[g]

| taof(Pparδ)            |                           |
|------------------------|---------------------------|
|                        | SRT501 Dataset Comparison |
| taof(Pparδ) hypothesis | ↑                         |
| exp(Acaa1a)            | ↑                         |
| exp(Acadl)             | ↑                         |
| exp(Acox1)             | ↑                         |
| exp(Acsi1)             | ↑                         |
| exp(Adfp)              | ↑                         |
| exp(Cd36)              | ↑                         |

[h]

| taof(Ppargc1α)            |                           |
|---------------------------|---------------------------|
|                           | SRT501 Dataset Comparison |
| taof(Ppargc1α) hypothesis | ↑                         |
| exp(Acat1)                | ↑                         |
| exp(Cpt1a)                | ↑                         |
| exp(Slc25a20)             | ↑                         |
| exp(Acox1)                | ↑                         |
| exp(Acadm)                | ↑                         |
| exp(Sod2)                 | ↑                         |

[i]

| Egf            |                                 |
|----------------|---------------------------------|
|                | SRT501<br>Dataset<br>Comparison |
| Egf hypothesis | ↓                               |
| exp(Acpp)      | ↓                               |
| exp(Ar)        | ↑                               |
| exp(Atp4a)     | ↓                               |
| exp(Cks2)      | ↓                               |
| exp(Cyp1a1)    | ↑                               |
| exp(Myo1b)     | ↓                               |
| exp(Ndrg1)     | ↑                               |
| exp(Psen2)     | ↓                               |
| exp(Stat5b)    | ↓                               |

[j]

| taof(NF-κB complex)            |                                 |
|--------------------------------|---------------------------------|
|                                | SRT501<br>Dataset<br>Comparison |
| taof(NF-κB complex) hypothesis | ↓                               |
| exp(Acpp)                      | ↓                               |
| exp(Acs1)                      | ↑                               |
| exp(Aldh1a7)                   | ↑                               |
| exp(Ar)                        | ↑                               |
| exp(Ass1)                      | ↓                               |
| exp(Bnip3)                     | ↑                               |
| exp(Cetn2)                     | ↑                               |
| exp(Irf1)                      | ↓                               |
| exp(Ly6e)                      | ↓                               |
| exp(Nuak2)                     | ↓                               |
| exp(Pdlim1)                    | ↓                               |
| exp(Sdc1)                      | ↓                               |
| exp(Sirpa)                     | ↓                               |
| exp(Slc29a1)                   | ↓                               |
| exp(Slc6a6)                    | ↓                               |
| exp(Tnk2)                      | ↓                               |

[k]

| taof(Nr3c1)            |                                 |
|------------------------|---------------------------------|
|                        | SRT501<br>Dataset<br>Comparison |
| taof(Nr3c1) hypothesis | ↑                               |
| exp(Acadm)             | ↑                               |
| exp(Acat1)             | ↑                               |
| exp(Acsm3)             | ↑                               |
| exp(Akp2)              | ↑                               |
| exp(Angptl4)           | ↑                               |
| exp(Bbc3)              | ↓                               |
| exp(Ces3)              | ↑                               |
| exp(Cfd)               | ↑                               |
| exp(Cyp1a1)            | ↑                               |
| exp(Cyp1a2)            | ↑                               |
| exp(Enc1)              | ↑                               |
| exp(Ndrg1)             | ↑                               |
| exp(Pfkfb3)            | ↑                               |
| exp(Vdp)               | ↑                               |

[l]

| Tnfa            |                                 |
|-----------------|---------------------------------|
|                 | SRT501<br>Dataset<br>Comparison |
| Tnfa hypothesis | ↓                               |
| exp(Acpp)       | ↓                               |
| exp(Acs1)       | ↑                               |
| exp(Akr1a4)     | ↑                               |
| exp(Aldh1a7)    | ↑                               |
| exp(Ass1)       | ↓                               |
| exp(Canx)       | ↑                               |
| exp(Cetn2)      | ↑                               |
| exp(Cfd)        | ↑                               |
| exp(Cpt1a)      | ↑                               |
| exp(Cpt2)       | ↑                               |
| exp(Cyp1a1)     | ↑                               |
| exp(Cyp1a2)     | ↑                               |
| exp(Dci)        | ↑                               |
| exp(Ech1)       | ↑                               |
| exp(Es22)       | ↑                               |
| exp(Gpiap1)     | ↓                               |
| exp(Irf1)       | ↓                               |
| exp(Ly6e)       | ↓                               |
| exp(Mgll)       | ↑                               |
| exp(Nuak2)      | ↓                               |
| exp(Oprs1)      | ↓                               |
| exp(Psen2)      | ↓                               |
| exp(Slc16a7)    | ↑                               |
| exp(Slc25a20)   | ↑                               |
| exp(Slc29a1)    | ↓                               |
| exp(Slc5a6)     | ↑                               |
| exp(Slc6a6)     | ↓                               |
| exp(Tnk2)       | ↓                               |

# Supplemental Data Figure 2

[a]

Calorie Restriction (CR) Hypothesis

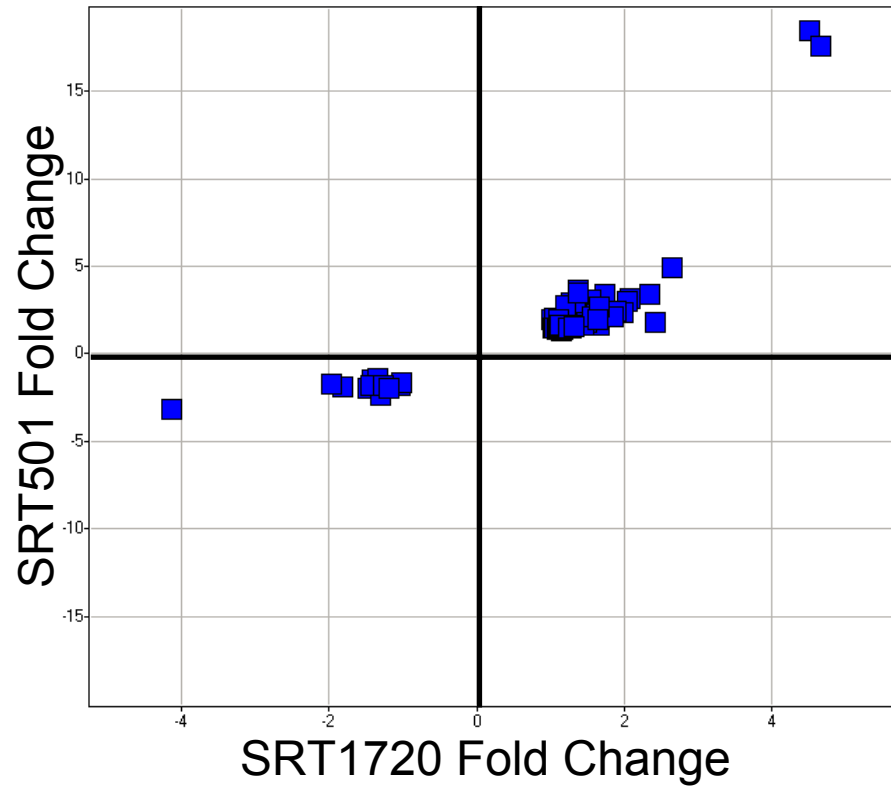

73 of 73 probe sets modulated in same direction after SRT501 and SRT1720 treatment ( $P < 10^{-5}$ )

[b]

Resveratrol Treatment Hypothesis

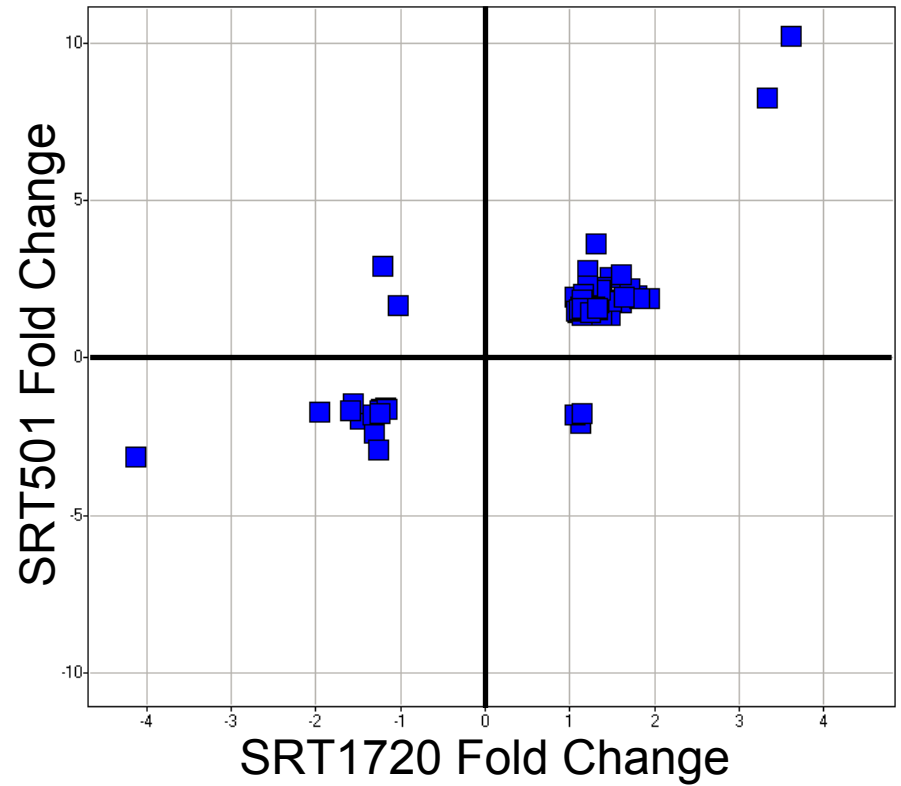

64 of 69 probe sets modulated in same direction after SRT501 and SRT1720 treatment ( $P < 10^{-5}$ )

[c]

### taof(Esrrα) Hypothesis

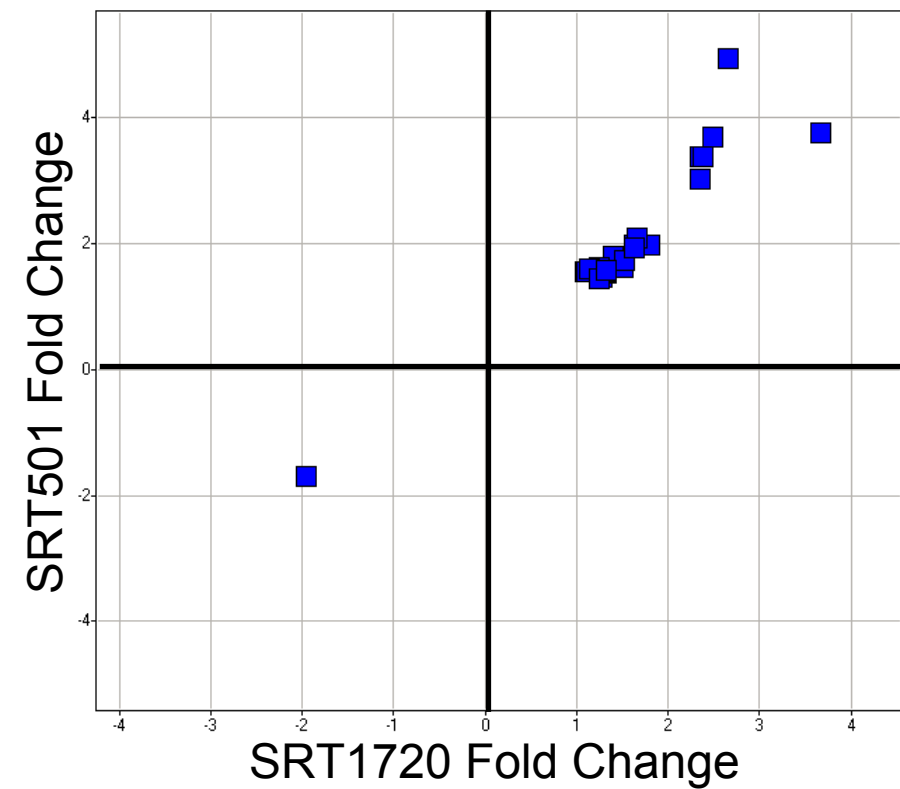

25 of 25 probe sets modulated in same direction after SRT501 and SRT1720 treatment ( $P < 10^{-5}$ )

[d]

### taof(Nrip1) Hypothesis

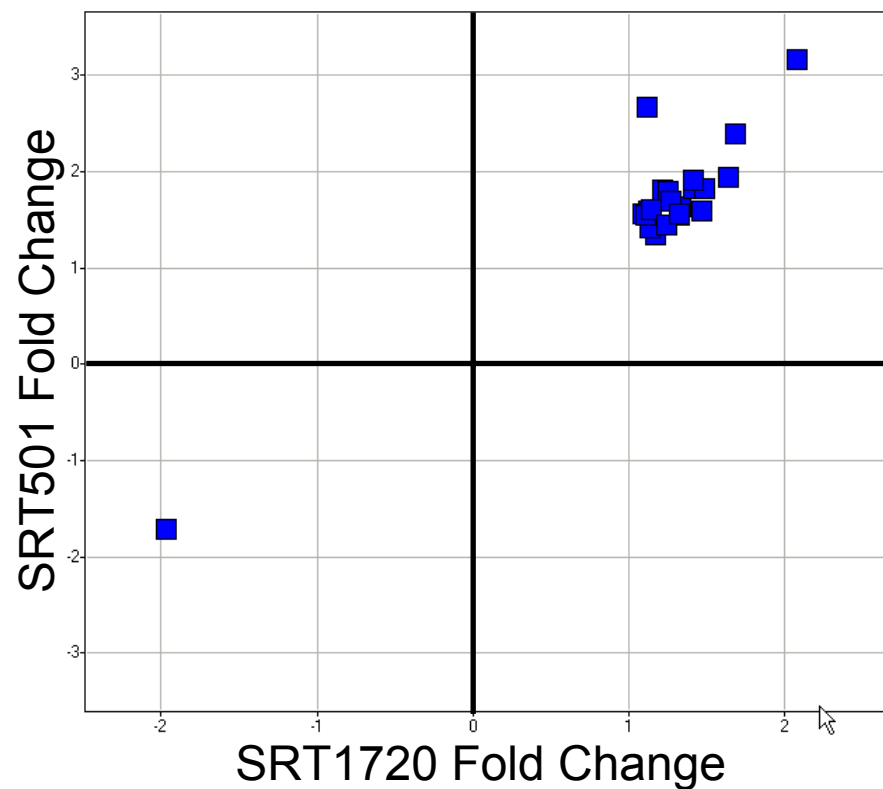

22 of 22 probe sets modulated in same direction after SRT501 and SRT1720 treatment ( $P < 10^{-5}$ )

[e]

### taof(Ppara) Hypothesis

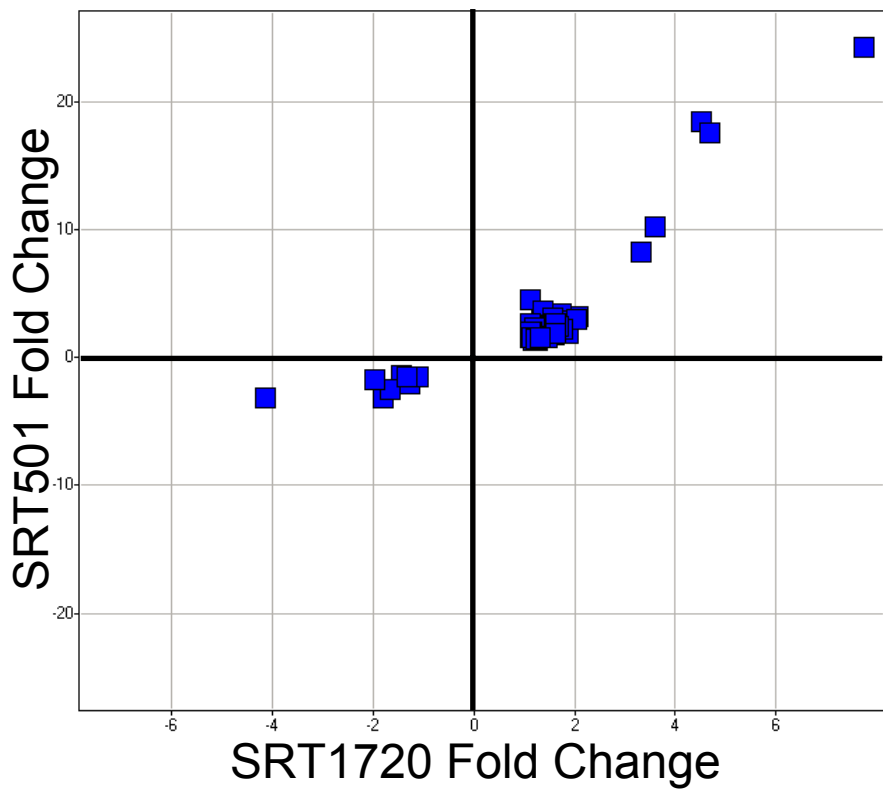

75 of 75 probe sets modulated in same direction after SRT501 and SRT1720 treatment ( $P < 10^{-5}$ )

[f]

### taof(Ppary) Hypothesis

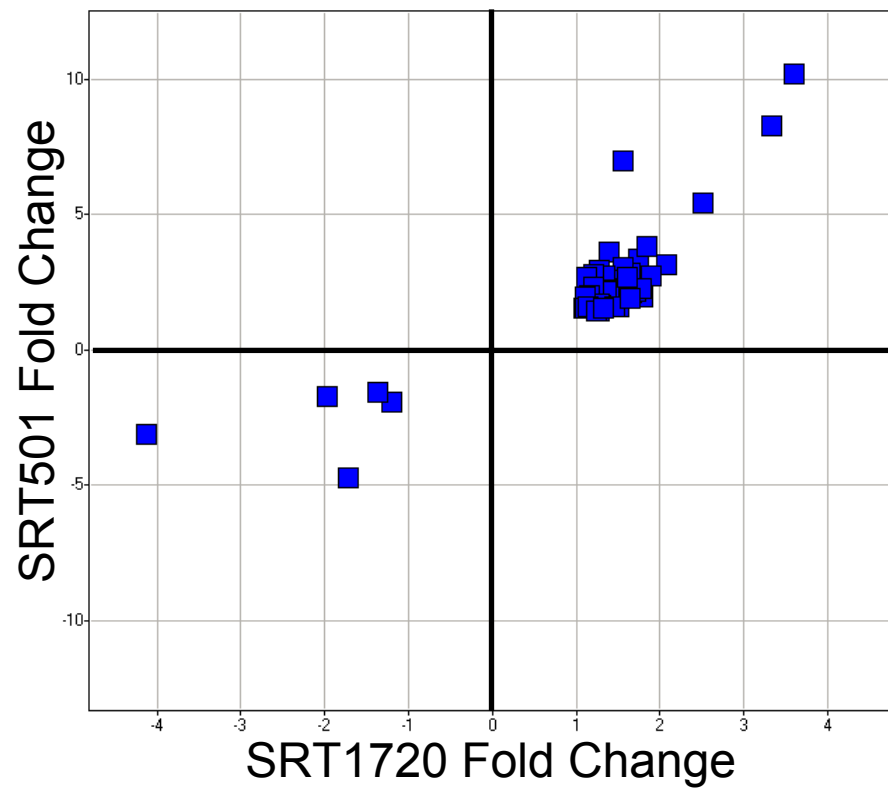

60 of 60 probe sets modulated in same direction after SRT501 and SRT1720 treatment ( $P < 10^{-5}$ )



[g]

### taof(Ppar $\delta$ ) Hypothesis

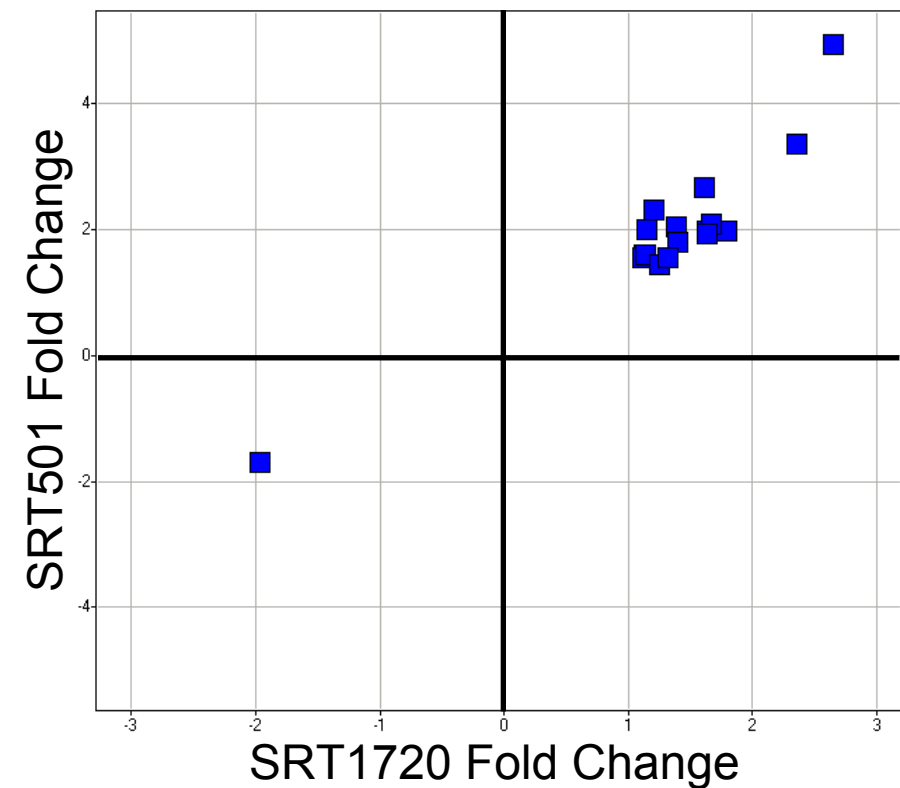

17 of 17 probe sets modulated in same direction after SRT501 and SRT1720 treatment ( $P < 10^{-5}$ )

[h]

### taof(Ppargc1 $\alpha$ ) Hypothesis

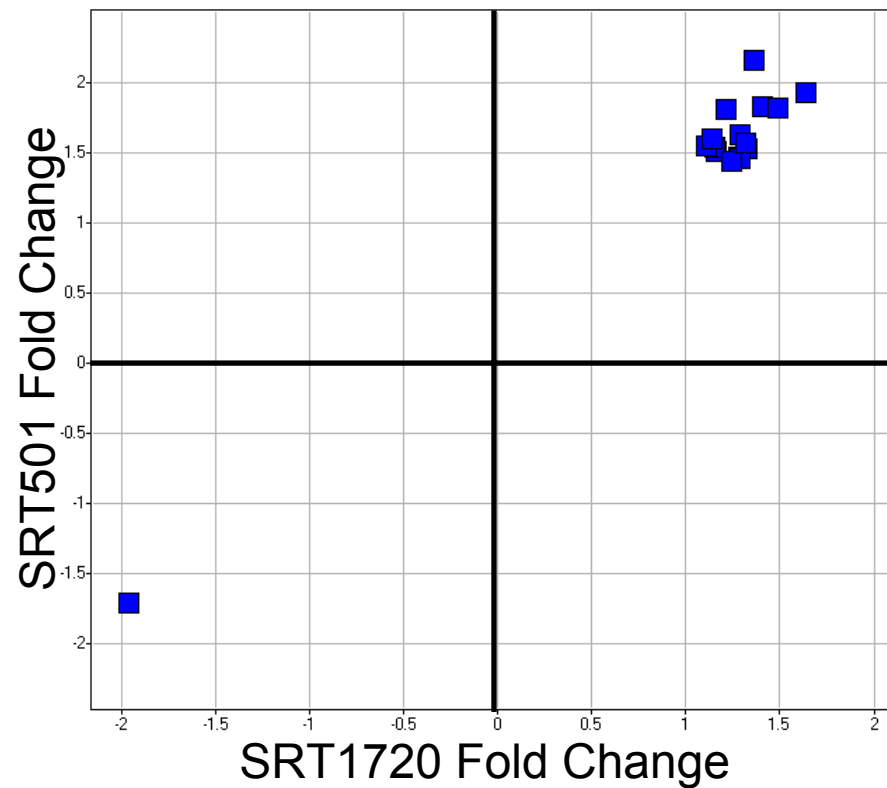

16 of 16 probe sets modulated in same direction after SRT501 and SRT1720 treatment ( $P < 10^{-5}$ )

[i]

## Egf Hypothesis

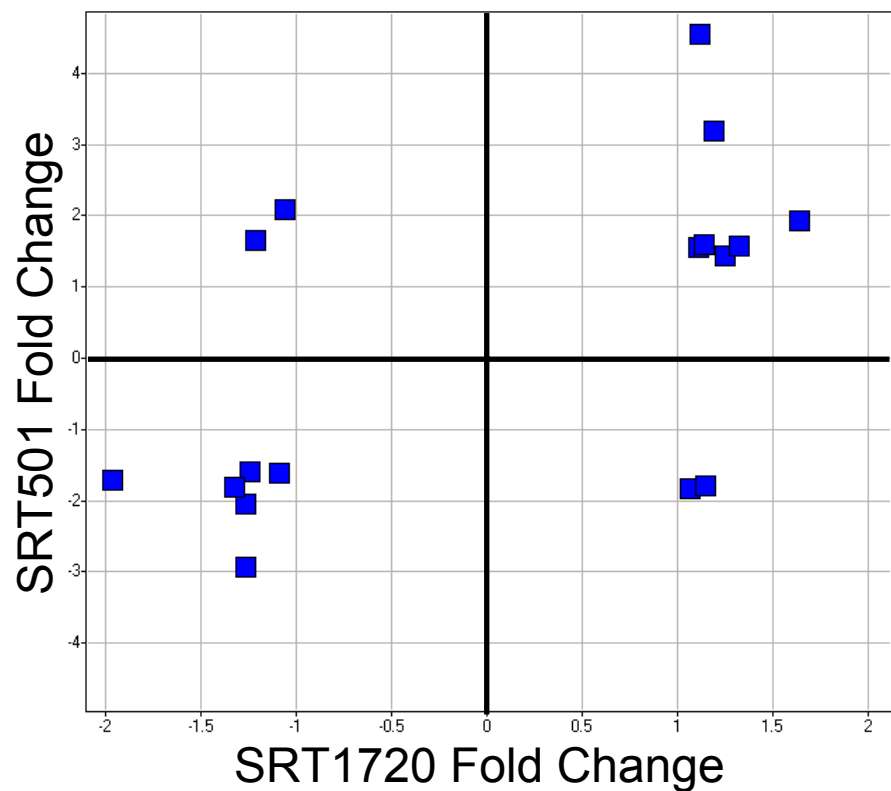

13 of 17 probe sets modulated in same direction after SRT501 and SRT1720 treatment ( $P < 10^{-5}$ )

[j]

taof(NF- $\kappa$ B complex) Hypothesis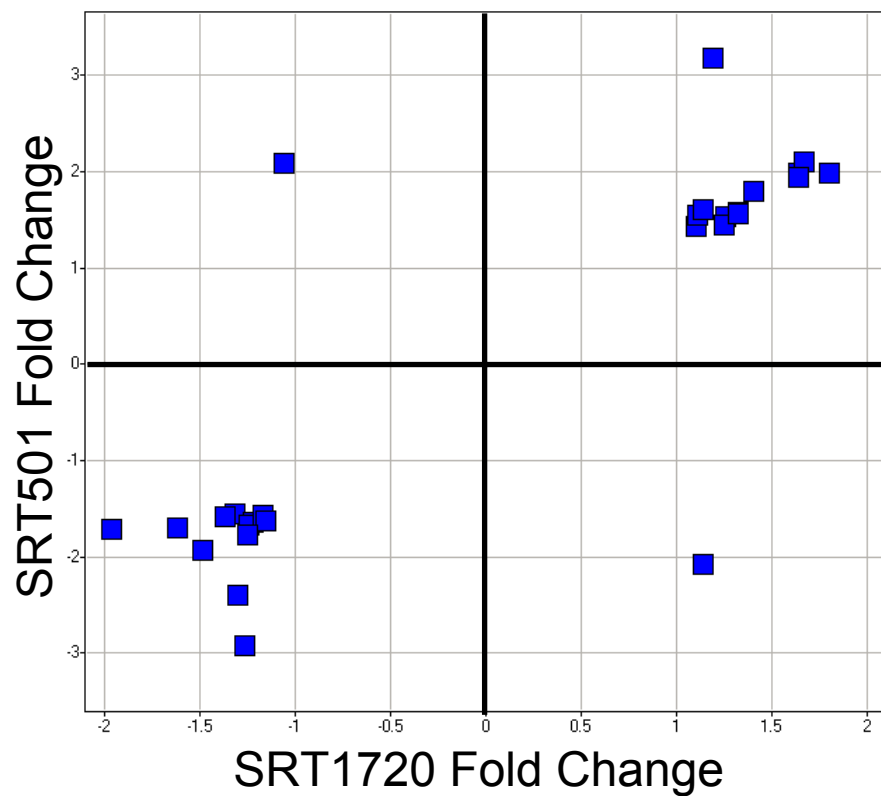

25 of 27 probe sets modulated in same direction after SRT501 and SRT1720 treatment ( $P < 10^{-5}$ )

[k]

### taof(Nr3c1) Hypothesis

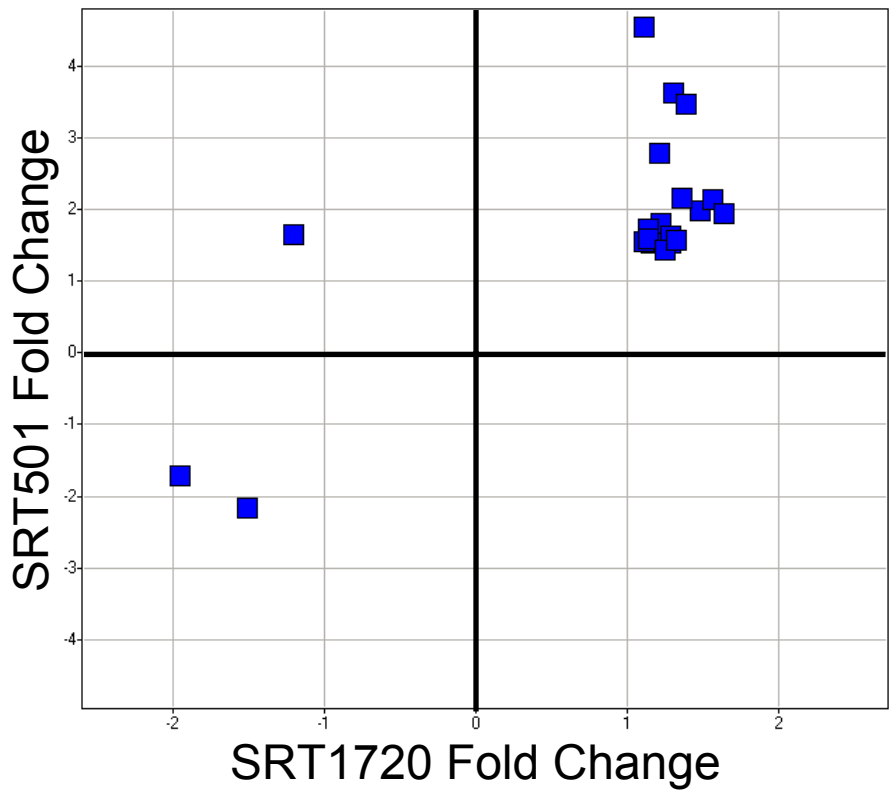

20 of 21 probe sets modulated in same direction after SRT501 and SRT1720 treatment ( $P < 10^{-5}$ )

[l]

### Tnfa Hypothesis

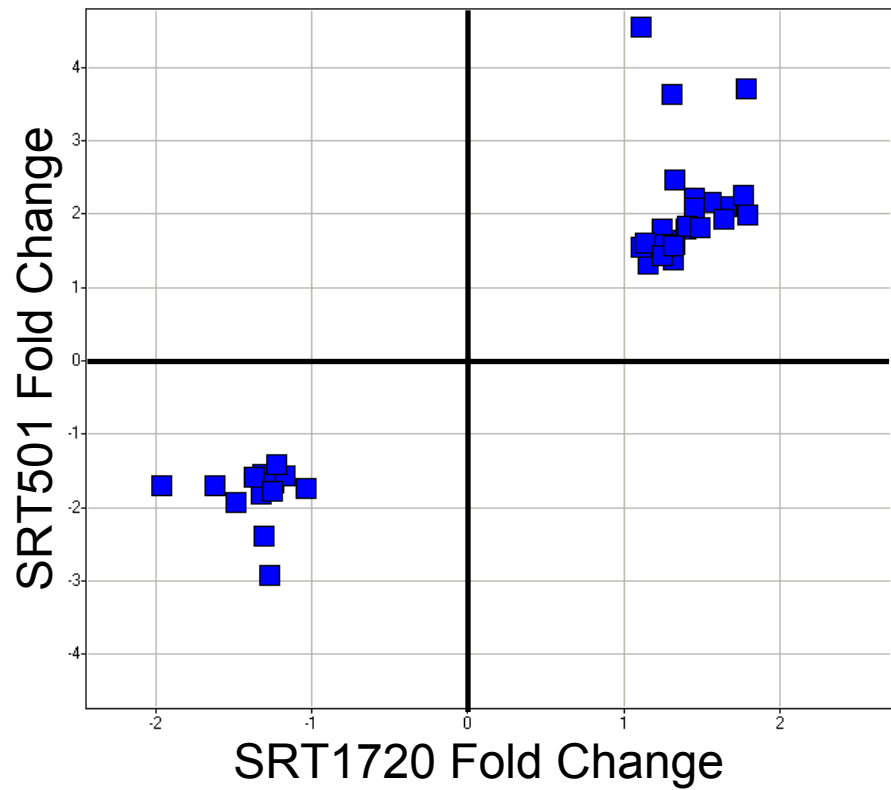

40 of 40 probe sets modulated in same direction after SRT501 and SRT1720 treatment ( $P < 10^{-5}$ )
